# Supplementary material for: iterb-PPse: Identification of transcriptional terminators in bacterial by incorporating nucleotide properties into PseKNC
Source: PLoS One. 2020 May 15;15(5):e0228479. doi: 10.1371/journal.pone.0228479 (PMC7228126; doi:10.1371/journal.pone.0228479)
Supplement: S6 Table — (CSV) [file pone.0228479.s006.csv]

S6 Table. Dataset with 159 non-terminator sequences of E. coli.
'>example_ '
'CACTTCCCAGTGTTCCGGTGACAGCGAAATCCCTTCGTTCTCTGCAATCACCACAGCCAGCGGCTCACTCCACTGGCTGC'
'>example_ '
'CGGCTAGCGAAGCCCAGAATGCTCAGCAGGCTGACGAAGATGTTGTACAGCGAAACATACAGGCTAACCGTGGCACGAAT'
'>example_ '
'GATGTACGGTCATGTGAAGAACTAACAATACGATCCATTGAGTCACTCTCTATGACAGATGTAATTAATTAAGCAGCATA'
'>example_ '
'AGAAAAAGGGGTTAGCATTTAGCTAACCCCTTATCTTATTTGGCGGAAGCGCAGAGATTCGAACTCTGGAACCCTTTCGG'
'>example_ '
'GAGTCACTCTCTATGACAGATGTAATTAATTAAGCAGCATAATGATAATGCGTAAGGGCACCCAGAAGTTTTACCCATCT'
'>example_ '
'CGGAAGCGCAGAGATTCGAACTCTGGAACCCTTTCGGGTCGCCGGTTTTCAAGACCGGTGCCTTCAACCGCTCGGCCACA'
'>example_ '
'TGGGGGCATTTTAATAAGTGAGGAAGTGATAGGAAGTGACCAGATAATACATATATGTTCTGTACTCTCTTGCGCATTTT'
'>example_ '
'GAGGGGGGGATTGACTCGCTTCGCTCGCCCTGCGGGCAGCCCGCTCACTGCGTTCACGGTCTGTCCAACTGGCTGTCGCC'
'>example_ '
'CCCGTACTTTCGTACGAGCTCTTCTTTAAATATGGCGGTGAGGGGGGGATTGACTCGCTTCGCTCGCCCTGCGGGCAGCC'
'>example_ '
'GAGGGGGGGATTGACTCGCTTCGCTCGCCCTGCGGGCAGCCCGCTCACTGCGTTCACGGTCTGTCCAACTGGCTGTCGCC'
'>example_ '
'CCCGTACTTTCGTACGAGCTCTTCTTTAAATATGGCGGTGAGGGGGGGATTGACTCGCTTCGCTCGCCCTGCGGGCAGCC'
'>example_ '
'GAGGGGGGGATTGACTCGCTTCGCTCGCCCTGCGGGCAGCCCGCTCACTGCGTTCACGGTCTGTCCAACTGGCTGTCGCC'
'>example_ '
'CCCGTACTTTCGTACGAGCTCTTCTTTAAATATGGCGGTGAGGGGGGGATTGACTCGCTTCGCTCGCCCTGCGGGCAGCC'
'>example_ '
'GAGGGGGGGATTCGAACCCCCGATACGTTGCCGTATACACACTTTCCAGGCGTGCTCCTTCAGCCACTCGGACACCTCAC'
'>example_ '
'CGCTGGTATATGGCACGACAGTTTTTAACATGTCGCCATCGCGGAGGTGAAGGTGCCAGTCGTCTGGGCGGCGGATCTTT'
'>example_ '
'GCCTGGCTTCACTTCAATGCCTTTCGCCAGTTTTTTCGCCATTGCTTCGCCCTGGCTGCCATCTTCGCGCAGGACGTAAG'
'>example_ '
'CCACGGTGGCGCTTCTCAACACCTCGATGGTGTGGCGTTTATCTTCCGTCTGCACCTGGTGCTGGGGATGACGTTATTCC'
'>example_ '
'AGTTGTCGGATGCGCTTCGCTTATCCGACCTACAGGGGAGGATATTGTAGGCCCGGTAAACGTGGTGCCATCGGGCAAAA'
'>example_ '
'AATATTTGATTGCGGATTCGTTTGAGAATTCCGGGGCTTTTGAAAGTGATGGTGGTGGGGGAAGGATTACTCAGCGCTGC'
'>example_ '
'GTTCAGGGACTTTTGAAAGTGATGGTGGTGGGGGAAGGATTACTCAGCGCTGCGCGCTTCGCCCTTCGGGTCGTTGCCTG'
'>example_ '
'TGGGCGCTGGTGAACTGGGAATTCGTAGCGAAAAATCTCGCTGCATAATAACTGATGGCAAATGCAGCATTGCCTGAAGC'
'>example_ '
'CTGTTAGCAACGCAAACTGTTTCAGGTTGTTTTCTGGCTGACATAAACACCAGCAATAATGCCAGTCCCGCGACAATCGC'
'>example_ '
'ACGCAGGTGACGTTTACGTTTGGTCGCTTTTTTGGTCAGAATGTGACGCAGGTTAGCGTGCTTGTGCTTAAAACCACCTT'
'>example_ '
'TTTCTTCTTAGGAGCGAGCACCATGATCATCTGGCGGCCTTCGATCTTCGTTGGGAAGGATTCGACCACTGCCAGTTCTT'
'>example_ '
'TGGTTCTGTCCGGGCAATGTTGCCAGATGCGTTCCAGGCCATGTTACCTGCACCGCTGGCCTCGGTAGCCTCTACCGTTA'
'>example_ '
'ATCCTCTTCCCGCTGTTTCGCCCCATATTTCCTTATCCGCATAGTATCAGGTGCGCTCCCCCTGCCTCACGTATATACTT'
'>example_ '
'AAAAAAACAGACTGCCGGAAATAAGCTGTAACAGTGCGAATACCCCCAGCACCATTACCAACAGCGTGACTACGCGGATA'
'>example_ '
'TTACGCCACTTCTGACGCCGCGCTATCTAACAGCGCCATCTCTTCGCTGTTCAGCAGTTTTTCGATGTTCACCAGAATCA'
'>example_ '
'ATAATCACCAGTTCAGCGGGTTGATAGAGTGCTCCAAGGCTTCCACCGGTCATCAAATAACCGCCGAAAACTGTACCGAG'
'>example_ '
'GTTAAACAGCCTGTACTCTCTGTTCATCCAGCAGTTGTGGGATAATATCGGCAGGATTCTGGGAAAGTTTACGTCTTTTT'
'>example_ '
'GTCCAGCCATTCCAACTCACTTTCGTTTAACGGTCCCGTTTTCATACGCTTTTCCTTGTGGATCTCAACTCGCCAGCACC'
'>example_ '
'CTTTGATTTTATTCTTATCTTTCCCATGGTACCCGGAGCGGGACTTGAACCCGCACAGCGCGAACGCCGAGGGATTTTAA'
'>example_ '
'CAAATGAAGTCTCCTGCCTGAAAGCGATGCTGACGCTGATGCTGCAGGCGATGGGACAAGCTGACGCGGGCCGCGTGATG'
'>example_ '
'CAGAAAAGAGATCAAATTAAGCCAGTAGCGGCCGCGTAACAGGCAACCTGGGTCTTATTTGGTGCATTAATTTTTTTCTG'
'>example_ '
'CCCCGTTCACACGATTCCTCTGTAGTTCAGTCGGTAGAACGGCGGACTGTTAATCCGTATGTCACTGGTTCGAGTCCAGT'
'>example_ '
'CCATTTTCCCCTCGATTATAAAACTTGAGTTATTCAGTAGTCTCCCCTCTTGCAACTCACACCCAAAACTGCCTAACGAA'
'>example_ '
'GTTTCCCGATAAAGACGCGATAGCGACATCCCGCATAAGGCATTTTTCTCTTTATCTTTGTACGGTACTTCATGGAACAG'
'>example_ '
'TAACTGTTTTGAGACTCATAGAGATGTCTCAAAACTAAAATTTGGCTCCTCTGACTGGACTCGAACCAGTGACATACGGA'
'>example_ '
'AACTGTTGATAGAAACGGCAAACAGTTGGGGAATTTAAAAATCGGGTTTGACAAAAGATTTTTCGCCGTTAAGATGTGCC'
'>example_ '
'TCAATTTCCTCTTCACTGCTTTCCATCACCTGCCGCTTGATATCCTCAACTGACAGTCCTGCATTACAAAGTTCCAGAAA'
'>example_ '
'AAGCACCGGAGACGTTGCAGAAGTTCTATCGCGAGAACGATCCGACCAACAGCATGAATCCGGGGATCGGTAAAACCAGT'
'>example_ '
'GCTCAACGCTGCTGCCGGCACAGGCATCACTTTACCGGTTTCAATCCAGGTACGCAGGCGGCTGGCATCGGCAAAATGGG'
'>example_ '
'ATCGCTAACTGATTAATTATAAATCAGTTAGCGAAATATCTTACTTGCAATCGGTGTGGAAAACGGTAGTATTAGCAGCC'
'>example_ '
'ATTCGATAAACAGACCGTGACACATCACAGCCTGTTTATTTTCTGTTATCAGAACGTCCAGACCACACCCGCCTGAGTAT'
'>example_ '
'ATGGTAGTGTGGGGTCTCCCCATGCGAGAGTAGGGAACTGCCAGGCATCAAATTAAGCAGTAAGCCGGTCATAAAACCGG'
'>example_ '
'TGCCAGAATCGCAAAAATCCTCTGCATTTTACGCTCTTTTTCCTCAACAGTCTGAAGCCCATAATCACCTCAGTTAACGA'
'>example_ '
'ATGAGAAAAACCGTTGACGAAGGTCGAGGCAATCCGTAATATTCGCCTCGTTCCCAACGGAACACAACGCGGAGCGGTAG'
'>example_ '
'TCCACCATTTCTCTGTTCAATGATTTTACTCTGGCGTAGGTGCGTGATTCTCGCTTGTTGTCTCATTCATTAAAATTCAA'
'>example_ '
'CGCTTCACGAACAAAGCCGCGGATCAGGCTAACCAGAGAGGAAAAAGCAATCACCGCGATTATGGCGTAATCAATCCAGA'
'>example_ '
'ATCGGGCAATGCGTGTCGGATGCGGCGTAAACGCCTTATCCGACCTACGGTTCTACCCCTGCGTAGGCCTGATAAGACGC'
'>example_ '
'AAATGGCGCTGGTTTCAGGACGCCAAGACGCGCCGCGACCAGGCTCACGCGCTCAAGGCCGAGATCGATAGTTTTACTGT'
'>example_ '
'TGATCCGGTACCGGGGGTACCACTACGCCTTCACGCGGCGCTTCAGGATTCGGCGCTGGCAGATTCATCAACTTCGCCAG'
'>example_ '
'TGAGTACACTACTCTCACTGATCGGGGTTTTCAGGCACACAAATAATAAGTTTATTCGCATCGCGAAGCAAACAGGGGGC'
'>example_ '
'AGCGGGATCGAACCGCTGACCTCTTGCATGCCATGCAAGCGCTCTCCCAGCTGAGCTATAGCCCCACGATGCGTTTACGT'
'>example_ '
'GAGAGAATTGCTGAATACGCTCCTGGAGCACGCGCCCCGGCGTATCGACAAATCATCAACGCGATAGATAATATGACAGA'
'>example_ '
'CTAATTACTGCTGATTTTCGCGTTCAGCAATAAAATCCAGCGCTTTGTTGATACGCTCGATACTGCGGGTCTTACCAATT'
'>example_ '
'TGCACGACCCACCAATGTAAAAAAGCGCCCTAAAGGCGCTTTTTTACTATCTGCGATACTCAAAGATTCGAACCTGCAGC'
'>example_ '
'GCGAAATTGCCTGATGCGCTTCACTTAGCAGACTACTATTTCCGGCAATTCCTGTCTCCTCACCTACTGTGTCAATGCAG'
'>example_ '
'GTTGAGATTCTCAGGAGAACCCCGCCGACCCGGCGGCGTGTTTGCCGTTGTTCCGTGTCAGTGGTGGCGCATTATAGGGA'
'>example_ '
'TCTTCATTAACTTCCAGGCGAATCACTTTACCCGGAACCAATTCACCAGACAGTATTTGCTGTGCCAGCGGGTTTTCGAT'
'>example_ '
'GGCGTTCTGGTTGCCAGTGGTAAACATGAAGATATGTACACCGCAATTAACGAATTGATCAACAAGCTGGAACGGCAGCT'
'>example_ '
'ACGGGTACTGTACTAAAGTCACTTAAGGAAACAAACATGAAACACATACCGTTTTTCTTCGCATTCTTTTTTACCTTCCC'
'>example_ '
'ACGGGCGAATGTCGTGGCCGATGCATGGGCTATGGGTGGACAAATTCCACGCAGCAATCTCACCACACAGGGTTTAGGAA'
'>example_ '
'ATCTTAGTTAAGACGCTCTTTGATACGAGCAGCCTTACCAGTACGCTCACGCAGGTAGTACAGTTTAGCTTTACGAACAG'
'>example_ '
'TAAGGGCGATACACCCGCATCGCCCTGATTGACATCGTTGATTCTTTGACCTAATTTAGTGAGTAAGGGTAAGGGAGGAT'
'>example_ '
'CATGCTGCCCTGCCATCGTAAATCCCCATTAAATAAACACAACGCATTGATCTGACTTTGATTTATTTTCTGGAGCAGAC'
'>example_ '
'TCGGCAAAGTGATGATAGATTGTGCAGTCTGCAGTAAATTGAAGAAATTTGATTGACGAGACGAGGCGAATCAGGTTTAA'
'>example_ '
'CTGACAATAACCTTCACGAAAAAAATTAGCTTATAAAGTCTGGGGGAATTACTCTCGCCACGTTAACGAGAGTAATTTTA'
'>example_ '
'TATAACGGATTGAAAATACATTGTTTATAAAAACAGCAGGCGCGCGGTAATGGCTGGATTGCGACACGGAGTTACTTTAT'
'>example_ '
'TTACTTTGCGTGCCAGTAAGCCGCTGCACGTACCCGCTGTGGGTCATACTGTTCCGCTTCAAAGCGGCGGCTTAAATTCT'
'>example_ '
'TTTTGGGTATAGTGTCGTGGACAGTCATTCATCTTTCTGCCCCTCCAAAAGTAAAAACCCGCCGAAGCGGGTTTTTACGT'
'>example_ '
'AACCAGGTGAAACTGACCGATAAGCCGCTTTCTTTTGGGTATAGCGTCGTGGACAGTCATTCATCTTTCTGCCCCTCCAA'
'>example_ '
'GTCACATATACTTTGGCATACGCCAGGTCGCGAGACATTTCGACACCGGAAACGGTGGTCATCATGCCCAGGCGAGGATC'
'>example_ '
'ACGTTGACCTGATAAGACGCGCCAGCGTCACATCAGGCAATCCATGCCGGATGCAGCGTAAACGCCTTATCCCGCATGGA'
'>example_ '
'TGCAATATAAAGTGCATTACGACACCACCCTGAACGGCGGCTTTGCCACCGCGATGGCGCTGAATGCCGATGCGACTGAA'
'>example_ '
'TAAATCTTTTGGGGAATCGATATTTTTGATGACATAAGCAGGATTTAGCTCACACTTATCGACGGTGAAGTTGCATACTA'
'>example_ '
'GTTAGTTCGAAAAGCAAAAAGGCCATCCTTTCGGATGGCCTTTCGCTTGATTTGATGTCTGGCAGTTTATGGCGGGCGTC'
'>example_ '
'CCCTACTCTCGCATGGGGAGACCCCACACTACCATCGGCGCTACGGCGTTTCACTTCTGAGTTCGGCATGGGGTCAGGTG'
'>example_ '
'TATGACTCACCCGGACGGTATGCAAATCAAAATTACCCGTCAGGAAATTGGTCAGATTGTCGGCTGTTCTCGTGAAACCG'
'>example_ '
'ATGTGGCGCAGACTGATTTATCACCCCGATATCAACTATGCACTTCGACAAACGCTGGTGCTATGTTTGCCCGTGGCCGT'
'>example_ '
'CCACCGGGTATTGTGACGGTGAATATCGATCGCAGCACCGGGCAGTTAGCTAATGGTGGCAACAGCCGCGAAGAGTATTT'
'>example_ '
'ACAAAGTGCACTTGTTTATGCCGGATACGGCGTGAACGCGTTATCCGGCTAACAAAATCGTGAAAACTCAATAAATTGCA'
'>example_ '
'CCGCGTAACACCTACGCTTCTCCGGAACAGTGGCAGGAAAAAGCCGAAACCCTGGCGAAACTGTTTATCGACAACTTCGA'
'>example_ '
'TGCGCCCGCGTTACCGGCACTGGCAGCCAGGCGCGAATGGAAAGCCCGCCCCGCTCGCTGGTGCCAAGCTCCAGCATCCC'
'>example_ '
'GCATGGCAATAACCACCGCCAAAAATTGCGCCAGTATGGGGATGCCGAAAAAAGTCATTACCAGCGAGGTCAAAATCCAT'
'>example_ '
'GGATCGATATGCCAGATATGATCGGCGTACTCTTTGATAGTACGGTCAGAAGAGAAGTAGCCCATATTGGCAATGTTCAG'
'>example_ '
'GGGGCGCAAATTTGGCAGGGAAATGTGTGTCGTGTAGGTCGAATAAGGCGGTCGCGCCGCATCCGACAATGGCCGGCACA'
'>example_ '
'TAGAGGATTACTCGCCACTTCGTGGCTCGCCCTGCGGGCCGTTGCTGGCGCAACGTTCTCTCGCTTCGCTCGAGTCGAAC'
'>example_ '
'AGATGCAAAAAAGCCTGCTCGTTGAGCAGGCTTTTCGAATTTGGTCGGTGATAGAGGATTACTCGCCACTTCGTGGCTCG'
'>example_ '
'TAGAGGATTCGAACCTCCGACCCCTTCGTCCCGAACGAAGTGCGCTACCAGGCTGCGCCAATCACCGAATGCGGGGCGCA'
'>example_ '
'AGCACCTGAATGCCGCCCTGCTCCTCAACCCAACTTAAAATAGCCTGATATTTCCCCGCATCGCCTTTCAGAAAGGCACC'
'>example_ '
'CGTGAACGCCTTATCCGGCCTACAAAATCATGAAAATTCAATACATTGCAAGATTTTCGTAGGCCTGATAAGCGTAGCGC'
'>example_ '
'GTACCCGTAAAGAAGAGCTGCTCACGACTCAGGAAGAACTGCAGAAAATGTGGATCCTGCGCAAAATCATTCACCCGATG'
'>example_ '
'TGCCGCGCTGGCGATGTTAGGAAAATTCCTGGAATTTGCTGGCATGTTATGCAATTTGCATATCAAATGGTTAATTTTTG'
'>example_ '
'GTGTTAGTGTCCTTACGGACGTGGGGGTTCAAGTCCCCCCCCTCGCACCACGACTTTAAAGAATTGAACTAAAAATTCAA'
'>example_ '
'CATTTCGTCACCCTCCCTTCGCAATAAACGCCCGTAATAACTCATTGCCCCACGGTATGATTTCGCCCTTAACGTATTGA'
'>example_ '
'CGACAGCGGCTACAAGCTCGGCCAGCGCGTACGCCACGCTAAGTTTGGTGAAGGCACCATTGTCAATATGGAAGGCAGCG'
'>example_ '
'ATCATTCAGATTCAATAAATTGCAACGTCATGTAGGCCGGATAGGGCGTTTACGCCGCATCCGGCATCTGCGCCATCTTC'
'>example_ '
'GAGATGGCTGAACAGATGCCGATCACCGCCAGCGAAATGCTCAGCGTTAACGGCGTTGGGATGCGCAAGCTGGAACGCTT'
'>example_ '
'CACCGTCGCCATGGTGCACATTGTGGCGCTTATGAGCCCCGGTCCCGATTTCTTTTTTGTCTCTCAGACCGCTGTCAGTC'
'>example_ '
'CCATTACCGCCATGTTACGGGTGCATGAAGGGCTAAATACATTACGTTTGCCGAATACGCCACAGGTAACTTTACGGATT'
'>example_ '
'TCAGGATTTGCTGAGTTTTTCTGATTTTTCCATACACTTCGTCATCGCTTCGATCACTGCAGCACGGAAGCCTTTCTCTT'
'>example_ '
'TAAGCTGTCACGTTTTGTGATGGCTATTAGAAATTCCTATGCAACAACTGAAAAAAAATTACAAAAAGTGCTTTCTGAAC'
'>example_ '
'CGTAATGCCTGATGCGCTATGTTTATCAGGCCAACGGTAGAATTGTAATCTATTGAATTTACGGGCCGGATACGCCACAT'
'>example_ '
'TAATGGATCGCCAGGTTGTCATCGATTAACAAAATACTGTTAATCAGCGAGTTGAGGATCTGCCCAGCATCGGGCTGCGT'
'>example_ '
'GCGACTCACCTGCTCCGGCCTACCACATCATCACCGTGTAGGCCGGATAAGACGCATTTGCGTCGCATCCGGCGTGATGT'
'>example_ '
'AATCTTCCTCGTGCGGACCTATTAAGGGAAGCGGTAGATCAATACCTGATAAATCAATCGCAAACAGCAAGAACCAGTGT'
'>example_ '
'ACGCCTTATCCGGCCTACAAAGTCGTATAAATTCAATGTATTGCAGTTTATTGGTAGGCCTGATAAGCGCAGCGCATCAG'
'>example_ '
'GATTATGGGCCTGGATGTGTGGGAACATGCTTACTACCTGAAATTCCAGAACCGCCGTCCGGACTACATTAAAGAGTTCT'
'>example_ '
'AAACAATGATCCGATAAAAATAAAACAGCGTTTCAATTGATGTGGTTTTGATCACTTTTATTGATTAAATGAATGTCTAT'
'>example_ '
'GTATTAATGATTTCGGAAAAAGGCAGATTCCTTTACCCTGAAACCGATGACAGAAGCAAAAATGCCTGATGCGCTTCGCT'
'>example_ '
'AAGTTATAGCCAATCTTTTTTTATTCTTTAATGTTTGGTTAACCTTCTGGCACGCTTTGCTCATCACAACACAACATAAG'
'>example_ '
'AAAACTACTACCGTCCGCGCGACGCTGAGGTGGCGAAAAAGTACGAAAATGCGTTTCCAAAGCTGAAGTTATTCACCATT'
'>example_ '
'ACCCTTGCATCTCTTTGAGGTACAGGGAAAAAAAGATGAAAAAAGCGGGTCTTCTTTTTTTGGTGATGATAGTTATCGCC'
'>example_ '
'CAGTCGGATATCAACCGGCTGGCACAGTTGTTGTAATTTCAGAAATTTAATAATGCCCGGTACTCATGTTTTCGGGTTTA'
'>example_ '
'TTTTTCATCTTCCCTGATTTTTCCTCACCATCATTGGTCATTTTTCGGTTGACGCCCTTCGGCTTTTCCTTCATCTTTAC'
'>example_ '
'GAGATGGTAATGCCGGGCGACAACATCAAAATGGTTGTTACCCTGATCCACCCGATCGCGATGGACGACGGTCTGCGTTT'
'>example_ '
'GTACCAGAACCTGGCTCATCAGTGATTTTCTTTGTCATAATCATTGCTGAGACAGGCTCTGTTGAGGGCGTATAATCCGA'
'>example_ '
'AAGCGCGTTCCCGGCAAACCGGCGGTAGCGGATTAGGGTTAGCGATCGTGAAACATGCTGTGAATCATCACGAAAGTCGC'
'>example_ '
'GCGTTAGATTTTACAACGATTGGTGATTTTTTGTTCGCATGATTAGCCATGTCTTTTTCACGGAAATAGTGTTTTATACT'
'>example_ '
'TTCAGCCTGATACAGATTAAATCAGAACGCAGAAGCGGTCTGATAAAACAGAATTTGCCTGGCGGCAGTAGCGCGGTGGT'
'>example_ '
'ATGAAGGGAATCTCATGTCAGTTCTGTATATCCAAATTCGTCGTAATCAAATTACTGTTCGCGATCTTGAAAGCAAACGT'
'>example_ '
'CGGTTTTCACTTCCCGCTACGTTACTTTGTCTATATTGGGATCACCGCCATTGTGCGCTTGATCATCGTCGATCATAAAT'
'>example_ '
'AGCAGTTTGTTGTGTTTTCTTCGTTTCCGGTTCCCAGAGCGCTTCCAGCTCCTCAAGGGTTTTACCTTTGGTTTCCGGGA'
'>example_ '
'ACGTCAGCAGCACAGCGATGTGCGTCCAAGCCGCCATCTGAATAAAGCGCACTGGAGCACCGTGTATCTCGACGGTTCGC'
'>example_ '
'GTGCCGTGTGTGATGCTTCGCACTCCGCGACGGTTTCTGGCGTACCGGAGACGAGGATCTCGCCGCCACCACTGCCGCCT'
'>example_ '
'AATATTGTGCGCGTCGGTCCCCGGCCTCTGCTGCCTTTAAATACTGGCTGCCAGGCTCGGAGTCGTTGGCGTGGGCAAAG'
'>example_ '
'CGCCAGTGCCGCTTCGCGCAGGCGAGTTTTCAACTTGTTGTACTCGTCAATCACGTACTGCTCGGCGGCGCGCTGATCGG'
'>example_ '
'TTCAACAGCATCACGGGGCCGCACGACATTTCACGTCAGTTAGTGCTATAGCTCAGGAACAAATTTTCCCGAATTGGGAT'
'>example_ '
'GGACTCGGAATCGAACCAAGGACACGGGGATTTTCAATCCCCTGCTCTACCGACTGAGCTATCCGGGCAACGGGGCGCAT'
'>example_ '
'AGCGAGGTGCGAGCAAGCTGGCGCTTGCATGGTGGCGTGCGACAGGTATAATCCACAACGTTTTCCGCATACCTCTTCAG'
'>example_ '
'AGTGTTTATCTATCTTTCCCGCTATATTAACTCTCTCAAGGTCAACCGATATCAACGTACATCTACCAACATATGTTGGT'
'>example_ '
'TCTGCCGATAGCGCGCTGTTGTTGGGAACCAGTGTGCTGGTGGTGGCGCTGGCCGGCATGATGTTTGTGACCCGTAATAT'
'>example_ '
'GCGCATCCGGCGAAATTTAAAGAGAGCGTGGAAGCGATTCTCGGTGAAACGTTGGATCTGCCAAAAGAGCTGGCAGAACG'
'>example_ '
'AATGACAGGGAAAAAGGAGAAATTCTCAATAAATGCGGTAACTTAGAGATTAGGATTGCGGAGAATAACAACCGCCGTTC'
'>example_ '
'GGAGCGTGCTGGCGTGTTGAAACGTCAGGCGCTGAAATATGCGTTAGGGTTGTAGCCTTACAACATTGCCGGATGCGTGC'
'>example_ '
'ACGAGGATTCGAACCTCGGAATGCCGGAATCAGAATCCGGTGCCTTACCGCTTGGCGATACCCCAACTGGGTGCACTTAC'
'>example_ '
'AGGGGGGTATAGATAGACGTCATTTTCATAGGGTTATAAATGCGACTACCATGAAGTTTTTAATTGAAAGTATTGGGTTG'
'>example_ '
'GCAATCAACCATTAACGCTTGATATCGCTTTTAAAGTCGCGTTTTTCATATCCTGTATACAGCTGACGCGGACGGGCAAT'
'>example_ '
'TTGCCGGTGGGAAAGGGACTGCGGATGAGAAATTCGCTGCTCTGGAAGCCGCAGGCGTGAAAACCGTTCGCAGCCTGGCG'
'>example_ '
'CGCTGCGCTATCAGGGTAAATTTATAGTCATCGGTATTAAAAGCGTTGCGGCTATATTCAAACACCCGACCATCAACTAA'
'>example_ '
'CGTTGCGTTAGCAACGGCCCGAAGGGCGAGACGAAGTCGAGTCATCCTGCACGACCCACCATCCTGAATGATTAAGGCAG'
'>example_ '
'TCAAAGATTCGAACCTGCAGCAGGTTTGAGTTGAGCGCAGCGAAACAACGGAGCCGCTCGCGGCGACGGCCCGAAGGGCG'
'>example_ '
'TGCACGACCCACCAATGTAAAAAAGCGCCCTAAAGGCGCTTTTTTGCTATCTGCGATACTCAAAGATTCGAACCTGCAGC'
'>example_ '
'CTCAATTTCACTTTGTAAACCTGATGACATCGTCAGAGCTTACTGTGCAAGCAACTCTATGTCGGTGGAATTAGGCGTAA'
'>example_ '
'AGGTAAGGATAAAAAAGGGTGCTGCAGGAGAATGGGATGGTTTTGCTTTATTAACAACGGGCTAAACGTGTAGTATTTGA'
'>example_ '
'TATGGCGGTGAGGGGGGGATTCGAACCCCCGATACGTTGCCGTATACACACTTTCCAGGCGTGCTCCTTCAGCCACTCGG'
'>example_ '
'GATCAATATGCCGCTCACAAAGCCCAGCAGACGAGAAATATTCAGCCAACGTTGGGAGATGACGCTTTGCTGTTTTAACC'
'>example_ '
'CTGATTTGTAAAATTATTTTGCGTCAGCTAAACCATCGAGGTAGCGTTCCGCATCAAGTGCTGCCATGCAGCCTGTACCG'
'>example_ '
'ACCCGTCTGGTTCATACCCTGAACGGTTCTGGTCTGGCTGTTGGTCGTACGCTGGTTGCAGTAATGGAAAACTATCAGCA'
'>example_ '
'TGATACCGAACAATAATTACTCCTCACTTACACGTAATACTACTTTCGAGTGAAAATCTACCTATCTCTTTGATTTTCAA'
'>example_ '
'GAAGTTGAAGCTAAATTCACCGGCGTTGATCGTAAAAACCGCGCAATCAGCCTGTCTGTTCGTGCGAAAGACGAAGCTGA'
'>example_ '
'AGGTTTCGTCCTGTAATCAAGCACTAAGGGCGGCTACGGCCGCCCTTAATCAATGCAGCAACAGCAGCCGCTTAATTTGC'
'>example_ '
'AGCGTATTGAAATCCGCGGTTTCGGCAGTTTCTCTTTGCACTACCGCGCACCACGTACCGGACGTAATCCGAAGACTGGC'
'>example_ '
'GGAAGCTGCCTCGCAGAGTTTTGAACAGTTTTCACCCTTTCGTTAAATTCTTCTGAATATGCCTCGGGGAACGCAAAATT'
'>example_ '
'CCAGGCCCAGAATCGGGTCGGCAGGAGCGGCGGTAATGTTCTCAAACATGACGAGGTTCCATTATGGTTACAGAAGGGAA'
'>example_ '
'AGAACTGGTAAACGATACCCACAGCAACGGTGTCGTCTGAACCTACGCCCAGTTTGTTGTCAGAATCGATCTGGTTGATG'
'>example_ '
'TTTCCATAGAGACGTGATGATATTTACAGCAATTTTAATCTATTTATATGATTTCCTTATATTTAAATTAACTAAACGGA'
'>example_ '
'TGTTGCAATGTAATATTCCGTAACAGGATGATCGTTATGGCGGGGTTGCAAATAGATTGCTTGACTTAACAAACAGATAA'
